# Supplementary material for: Prediction of the absolute hydraulic conductivity function from soil water retention data
Source: Copernicus journal article supplement (doi:10.5194/hess-2022-431), 2023-01-13
Supplement: Supplementary file 1 [file hess-2022-431-supplement.pdf]

1    **Supplemental Material**

2    **Title: Prediction of the absolute hydraulic conductivity function from soil water retention**  
3    **data**

4    Authors: Andre Peters<sup>1</sup>, Tobias L. Hohenbrink<sup>1</sup>, Sascha C. Iden<sup>1</sup>, Martinus Th. van Genuchten<sup>2,3</sup>, and  
5    Wolfgang Durner<sup>1</sup>

6    <sup>1</sup>Division of Soil Science and Soil Physics, Institute of Geoecology, Technische Universität  
7    Braunschweig, Germany

8    <sup>2</sup>Department of Earth Sciences, Utrecht University, Netherlands

9    <sup>3</sup>Department of Nuclear Engineering, Federal University of Rio de Janeiro, Rio de Janeiro, Brazil

10   Corresponding author: E-mail: a.peters@tu-braunschweig.de, phone: +49 531 5633

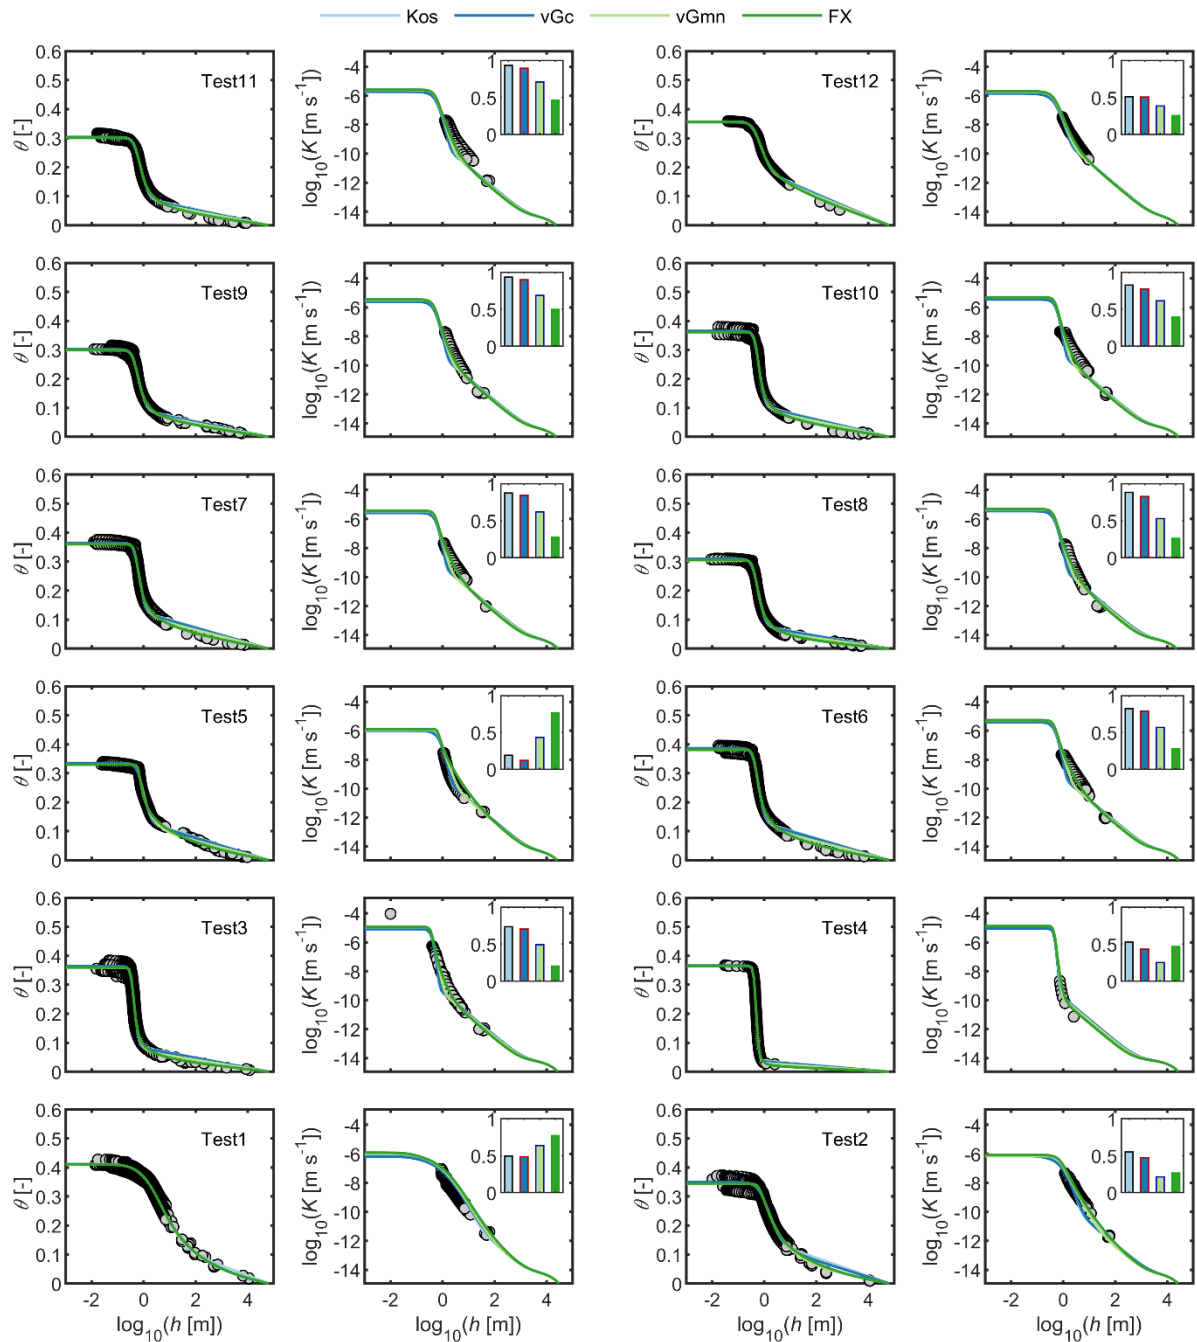

11

12 S1: Measured data (dots), fitted retention functions (left) and predicted conductivity functions  
 13 (right). Shown are the first 12 out of the 23 test data sets. Bars show the  $RMSE_{\log K}$  values for the  
 14 different used basic functions. Note that the conductivity curves are not fits to the data but pure  
 15 predictions.

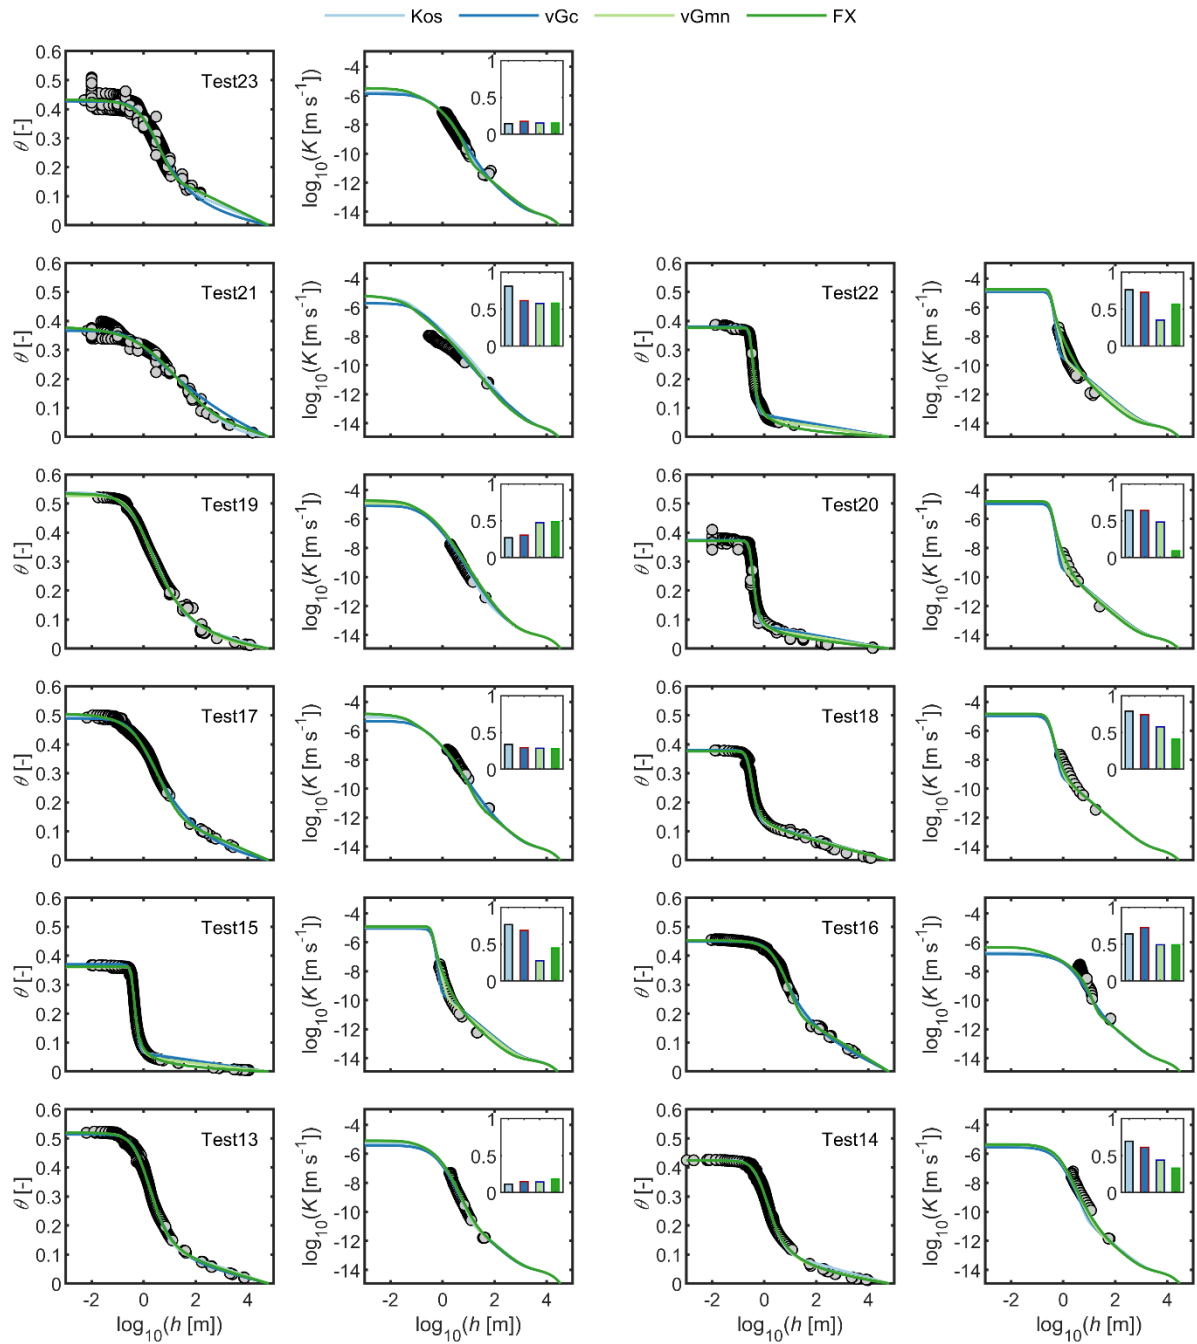

S2: Measured data (dots), fitted retention functions (left) and predicted conductivity functions (right). Shown are data set 13 to 23 of the test data sets. Bars show the RMSE<sub>logK</sub> values for the different used basic functions. Note that the conductivity curves are not fits to the data but pure predictions.
